# Supplementary material for: Lycorine impedes 7,12-dimethylbenz(a)anthracene exposed hamster oral carcinogenesis through P13K/Akt and NF-κB inhibition
Source: publisher site journal article supplement (doi:10.1515/tjb-2021-0284), 2022-06-17
Supplement: Supplementary file 1 [file j_tjb-2021-0284_suppl.docx]

**Supplementary figures**


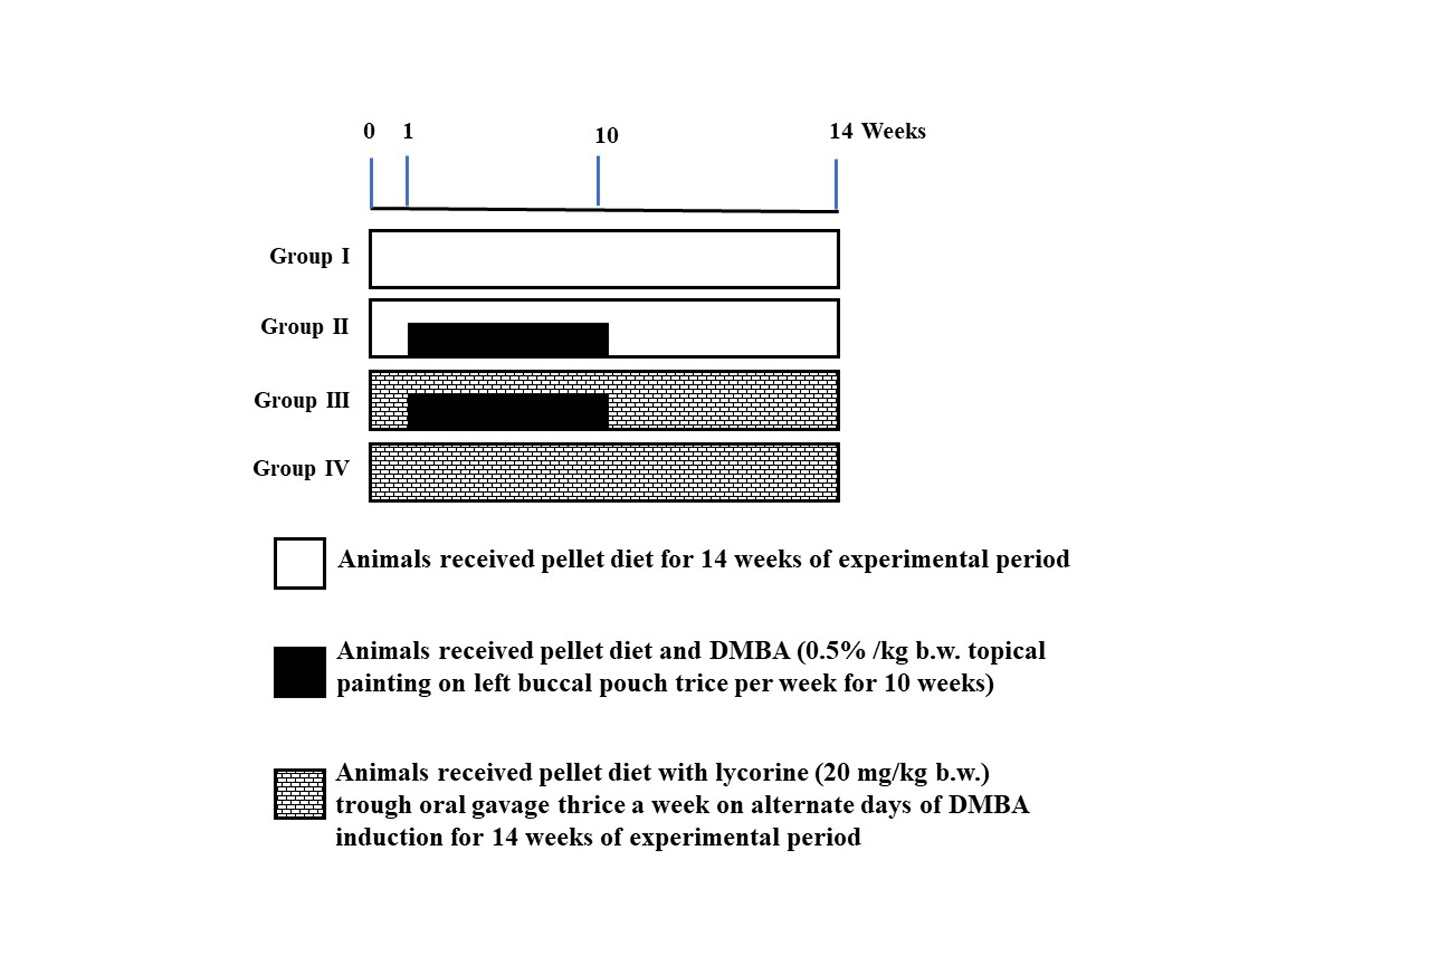


**Supplementary Figure. 1.** Experimental design of DMBA induced oral cancer in hamsters.


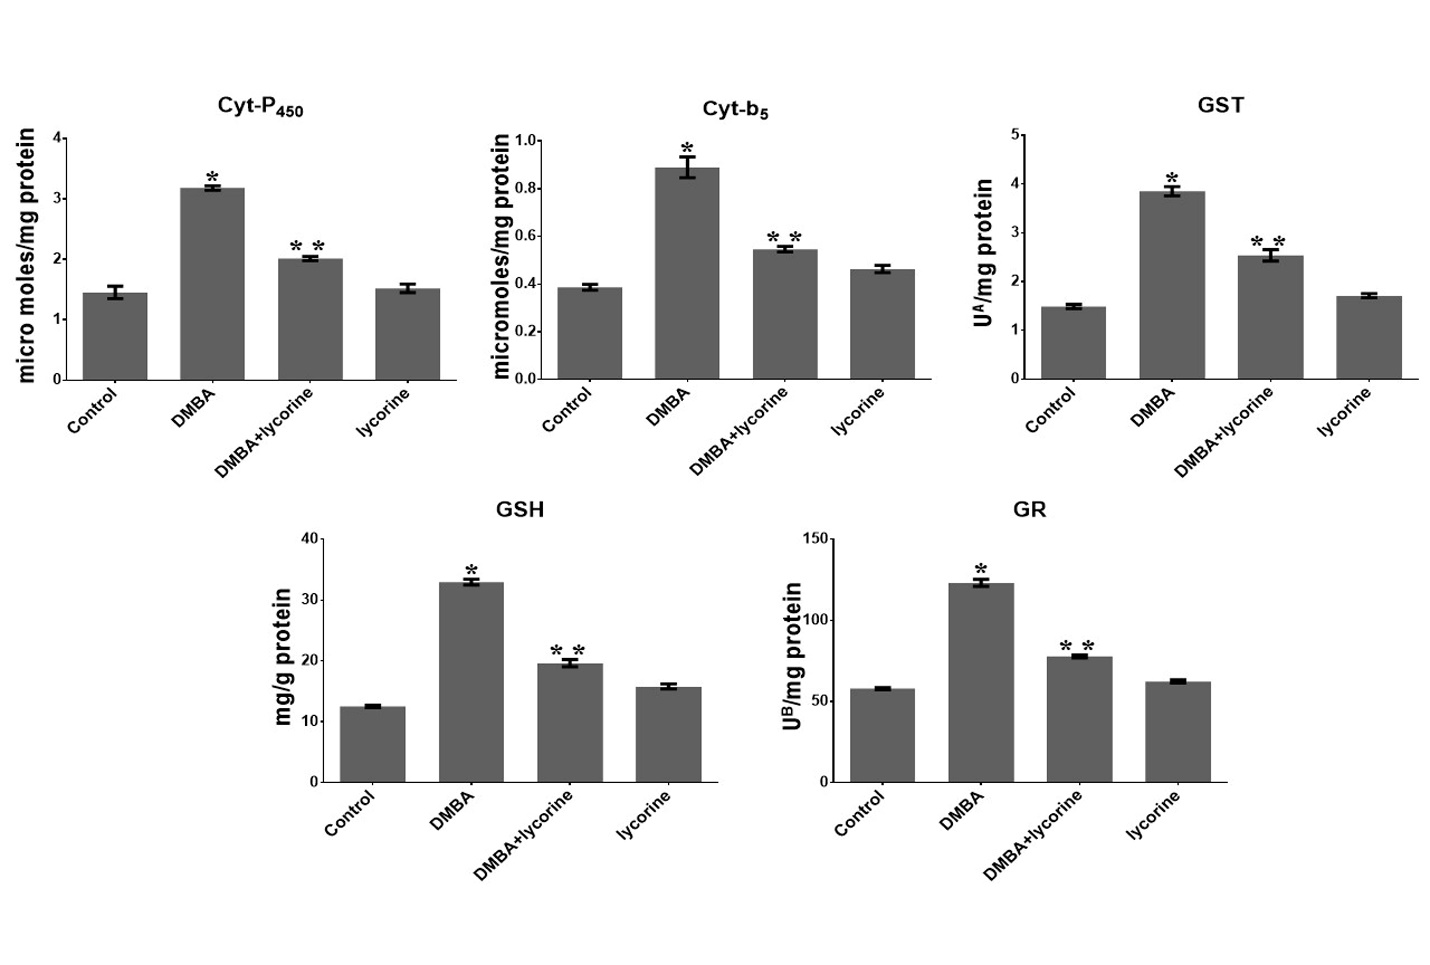


**Supplementary Figure. 2.** Status of phase I and phase II detoxification agents in the buccal mucosa of all experimental hamsters.

A-Micromoles of CDNB/GST conjugate developed per minute. B-Micromoles of NADPH oxidized per minute. Values are shown as mean ± SD (n = 6). * P<0.05, ** P <0.01 vs control group.


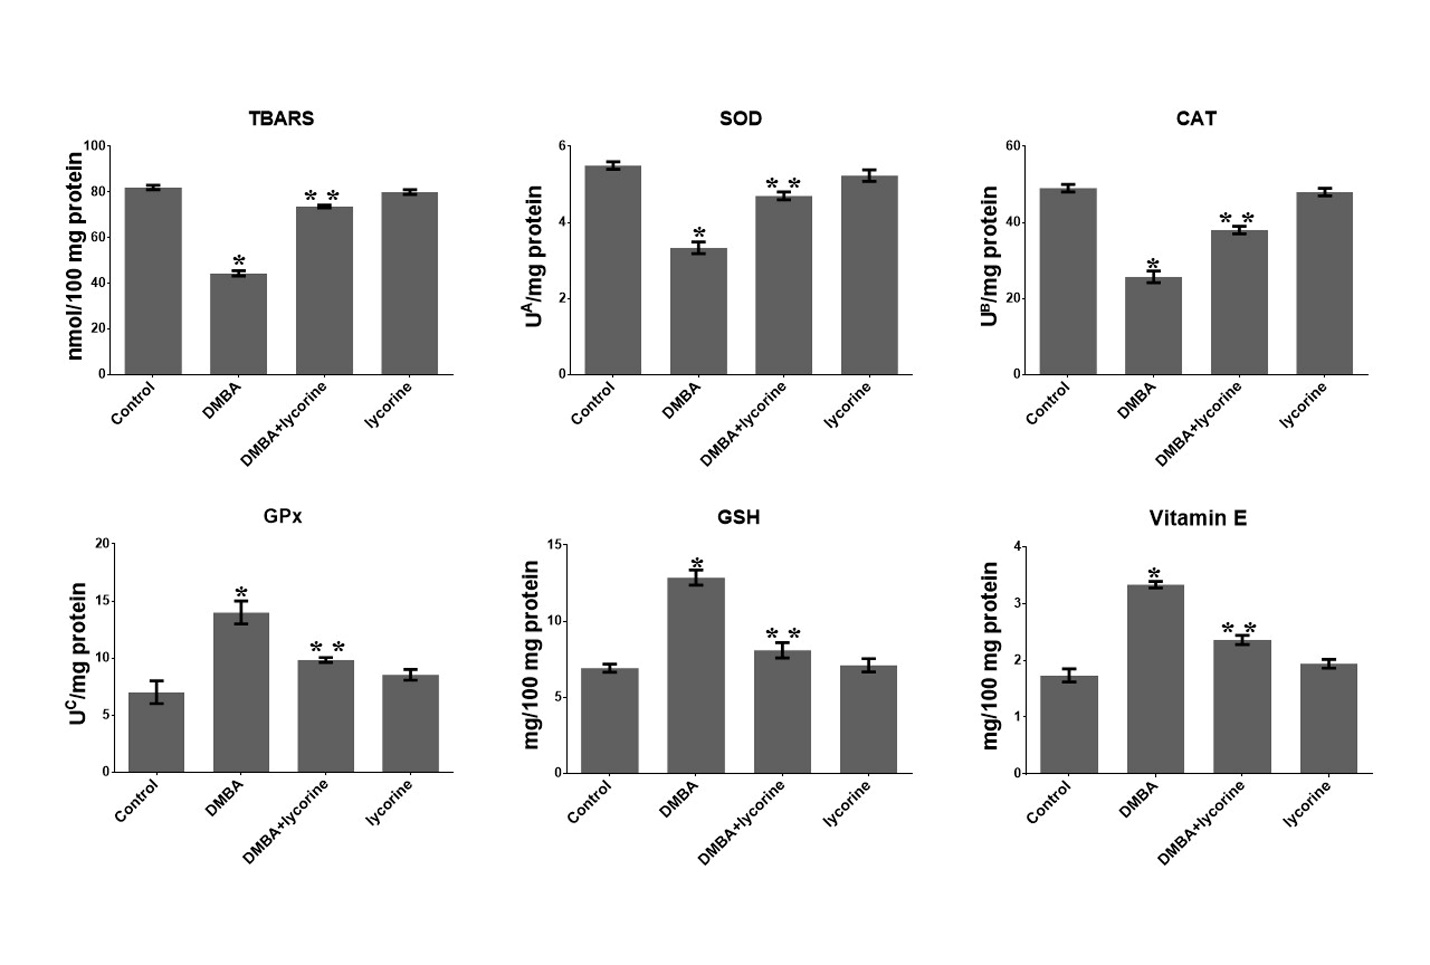


**Supplementary Figure. 3.** Effect of lycorine on TBARS and antioxidants in buccal mucosa of all experimental hamsters.

A-The quantity of enzyme essential to inhibit 50% NBT reduction, B-Micromoles of hydrogen peroxide utilized/second, C-Micromoles of glutathione utilized/minute. Values are shown as mean ± SD (n = 6). * P<0.05, ** P <0.01 vs control group.
